# Supplementary material for: Targeted and Untargeted Metabolomics Profiling of Wheat Reveals Amino Acids Increase Resistance to Fusarium Head Blight
Source: PubMed Central journal article supplement (PMC8639535; doi:10.3389/fpls.2021.762605), 2021-11-19
Supplement: Presentation_1.pdf [file Presentation_1.pdf]

## Supplementary Figure

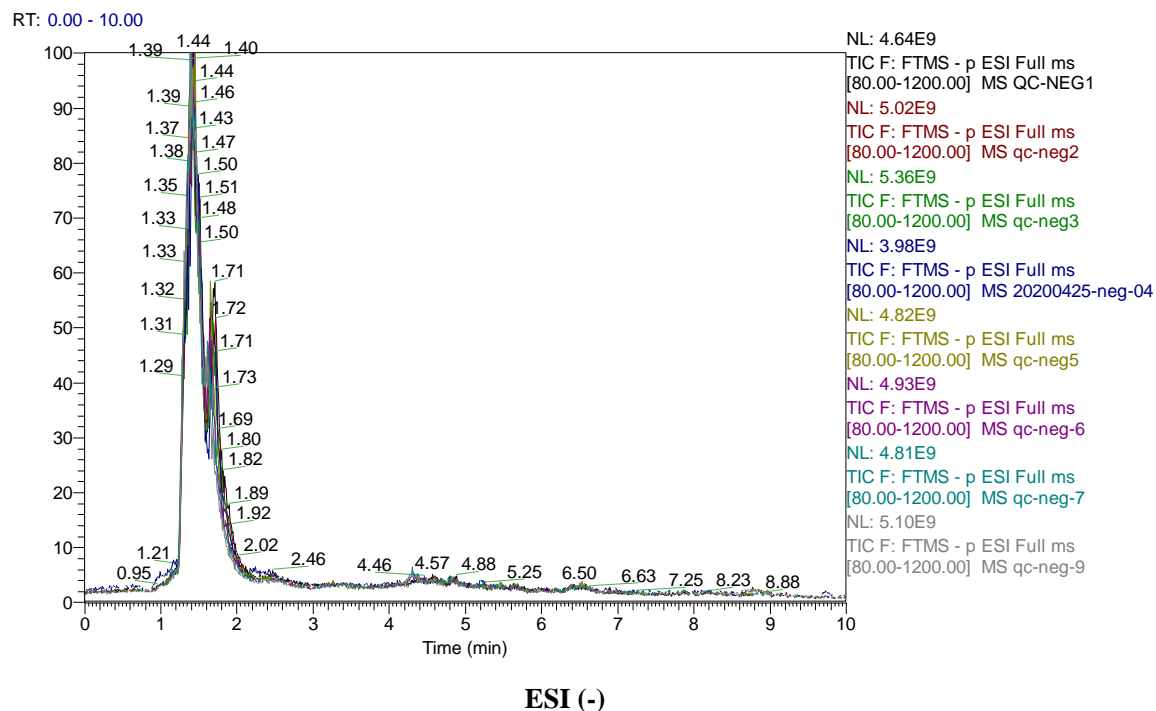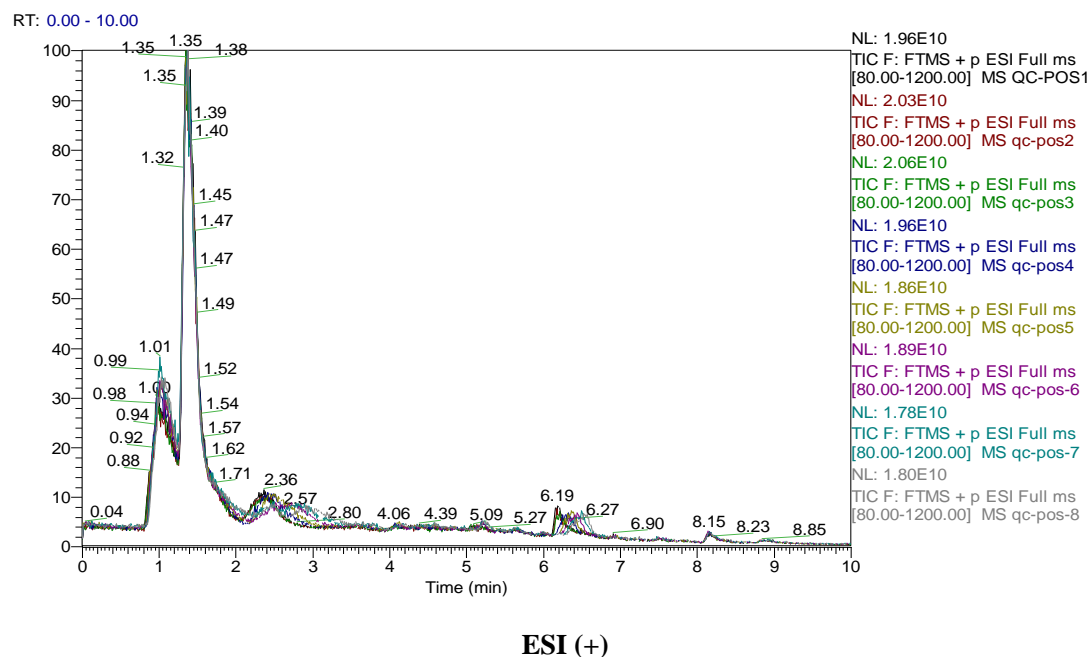

**Supplementary Figure 1.** TIC (Total ion chromatogram) showed that the peak shape reproducibility of QC samples was well, indicating that the system was stable.
